# Supplementary material for: Dietary Sugar Intake and Its Association with Obesity in Children and Adolescents
Source: MDPI journal article supplement (doi:10.3390/children8080676), 2021-08-03
Supplement: s1 [file s1]

**Supplementary Table S1:** Grouping of primary food groups for specific study purposes

| Original grouping                                                            | Modified grouping        |
|------------------------------------------------------------------------------|--------------------------|
| <b>Fruits</b>                                                                |                          |
| Fresh fruits, cooked or dried                                                | Fruit group              |
| Fruit juice                                                                  |                          |
| Natural fruit juices unsweetened                                             |                          |
| <b>Non-starchy vegetables</b>                                                |                          |
| Green leafy vegetables                                                       | Vegetable group          |
| Tomatoes, carrots, lettuce                                                   |                          |
| Mixed and other vegetables                                                   |                          |
| Vegetable juice                                                              |                          |
| Starchy vegetables                                                           |                          |
| Corn, beans, green beans                                                     |                          |
| Pumpkin                                                                      |                          |
| Sweet potatoes                                                               |                          |
| Potatoes                                                                     |                          |
| <b>Wholegrain cereals</b>                                                    |                          |
| Wholegrain - crudely processed cereal products                               | Wholegrain cereals       |
| <b>Processed cereals</b>                                                     |                          |
| Processed grain & cereal products including breakfast cereals                | Refined cereals          |
| <b>Legumes</b>                                                               |                          |
| Legumes (i.e., beans)                                                        | Plant protein            |
| Meat alternatives, soy, tofu                                                 |                          |
| <b>Nuts</b>                                                                  |                          |
| Nuts, almonds, seeds                                                         |                          |
| Peanut butter                                                                |                          |
| Almond milk                                                                  |                          |
| Milk and milk drinks low in sugar                                            | Milk                     |
| Yogurt                                                                       |                          |
| <b>Cheese</b>                                                                | Non milk dairy           |
| Eggs                                                                         |                          |
| <b>Fish and Shellfish</b> (including fresh and frozen)                       | Animal protein           |
| Shellfish                                                                    |                          |
| <b>Red meat</b> (Lamb, pork, veal, game)                                     |                          |
| <b>White meat</b> (poultry)                                                  |                          |
| <b>Processed red meat</b> (Sausages, ham, salami, bacon of red meat origin)  | Processed animal protein |
| <b>Processed white meat</b> (Sausages of white meat origin, Chicken nuggets) |                          |
| <b>Processed fish</b> (Smoked, canned and salted fish)                       |                          |
| Fish sticks                                                                  |                          |
| <b>Olive oil and Olives</b>                                                  | Olive oil                |
| <b>Vegetable fat</b>                                                         | Other oils               |
| Vegetable oils, vegetable fat, vegetable oil-based salad dressing            |                          |

|                                                         |                |
|---------------------------------------------------------|----------------|
| <b>Animal fat</b>                                       | All other fats |
| Butter, mayonnaise                                      |                |
| White sauce, cream                                      |                |
| <b>Sugar-sweetened beverages</b>                        | SSb's          |
| Carbonated and non-carbonated sugar-sweetened beverages |                |
| <b>Desserts and Sweets</b>                              |                |
| <b>Sweets, candy, chocolate</b>                         |                |
| <b>Milk desserts</b>                                    |                |
| <b>Sugary foods (i.e., baklavas)</b>                    |                |
| <b>Sugar</b>                                            |                |
| Sugar, honey, syrup                                     | Sweets         |
| <b>Baked products</b>                                   |                |
| Cake, biscuit, pie, muffin, doughnuts                   |                |
| <b>Fast-Food</b>                                        | Fast food      |
| Pizza, souvlaki, burger, fried potatoes                 |                |
| <b>Baby food</b>                                        | Baby food      |
